# Supplementary material for: Composite Nanoarchitectonics with CoS2 Nanoparticles Embedded in Graphene Sheets for an Anode for Lithium-Ion Batteries
Source: MDPI journal article supplement (doi:10.3390/nano12040724), 2022-02-21
Supplement: s1 [file s1]

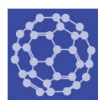

# Composite Nanoarchitectonics with CoS<sub>2</sub> Nanoparticles Embedded in Graphene Sheets for an Anode for Lithium-Ion Batteries

Tongjun Li <sup>1,2,3,4</sup>, Hongyu Dong <sup>2,3,4,\*</sup>, Zhenpu Shi <sup>1,2</sup>, Hongyun Yue <sup>2,3,4</sup>, Yanhong Yin <sup>2,3</sup>, Xiangnan Li <sup>1,2</sup>, Huishuang Zhang <sup>1,2,4</sup>, Xianli Wu <sup>5</sup>, Baojun Li <sup>5</sup> and Shuting Yang <sup>1,2,3,4,\*</sup>

<sup>1</sup> School of Physics, Henan Normal University, Xinxiang 453007, China; tongjunxiaoyu@163.com (T.L.); zhenpushi@foxmail.com (Z.S.); lxn506@163.com (X.L.); zhanghuishuang0000@163.com (H.Z.)

<sup>2</sup> School of Chemistry and Chemical Engineering, Henan Normal University, Xinxiang 453007, China; yuehongyun@foxmail.com (H.Y.); yinyh@163.com (Y.Y.)

<sup>3</sup> National and Local Joint Engineering Laboratory of Motive Power and Key Materials, Xinxiang 453007, China

<sup>4</sup> Collaborative Innovation Center of Henan Province for Motive Power and Key Materials, Xinxiang 453007, China

<sup>5</sup> College of Chemistry, Zhengzhou University, Zhengzhou 453000, China; wuxianli@zzu.edu.cn (X.W.); lbjfc@zzu.edu.cn (B.L.)

\* Correspondence: donghy373@163.com (H.D.); shutingyang@foxmail.com (S.Y.); Fax/Tel.: +86-373-332-6439 (S.Y.)

## Fabrication of the Half Cells

Li-battery performance was determined using CR 2032 type coin cells assembled in an argon-filled glove box (MBRAUN). The prepared active material, the conductive agent acetylene black and the binder polyvinylidene fluoride (PVDF) were mixed evenly according to the mass ratio of 8:1:1 and adjusted into paste. Coat the copper foil evenly with a coating device, dry it at room temperature, and dry it at 60 °C for 12 h in a vacuum drying oven. The dry electrode was cut into 12 mm diameter discs and pressed with 6 MPa pressure to prepare the working electrode for use (the area mass load of the electrode was 1.8 mg/cm<sup>2</sup>). With lithium metal as counterelectrode and reference electrode, the test cell was assembled in a glove box filled with argon gas using a polypropylene diaphragm (PP) and 1 mol/L LiPF<sub>6</sub> (DMC:EC = 1:1, volume ratio) as electrolyte. Under different rates, CT2001A blue battery test system was used to conduct constant current charge and discharge test in the voltage range of 0.05–3 V. The test cell is tested with Cyclic Voltammetry (CV) and electrochemical impedance spectroscopy (EIS) on an electrochemical workstation, with the frequency range of AC impedance measurements being 10<sup>-1</sup>–10<sup>-5</sup> Hz.

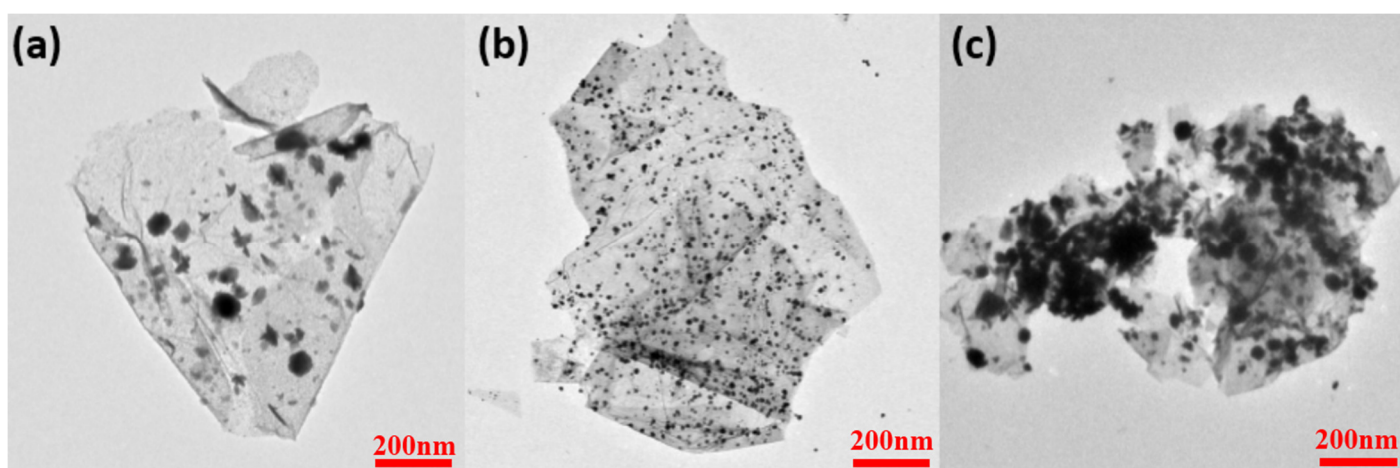

**Figure S1.** (a–c). The quality of GO added is the TEM image corresponding to 1:2:3.

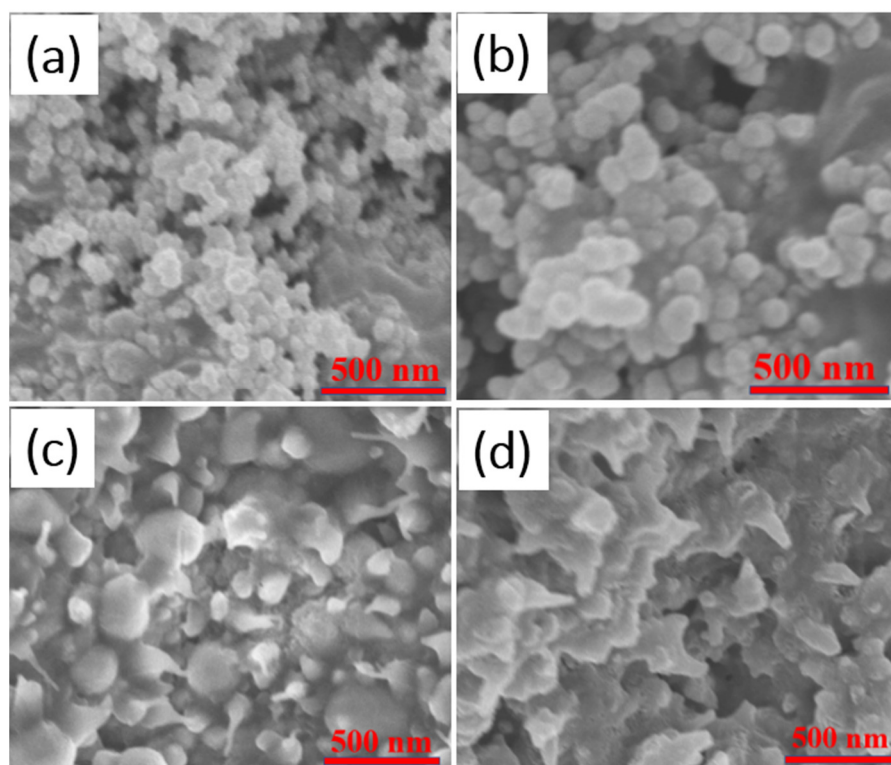

**Figure S2.** (a) CoS<sub>2</sub>@rGO material morphology after 50 cycles; (b) Morphology after 100 cycles; (c) Morphology after 150 cycles; (d) Morphology after 500 cycles.

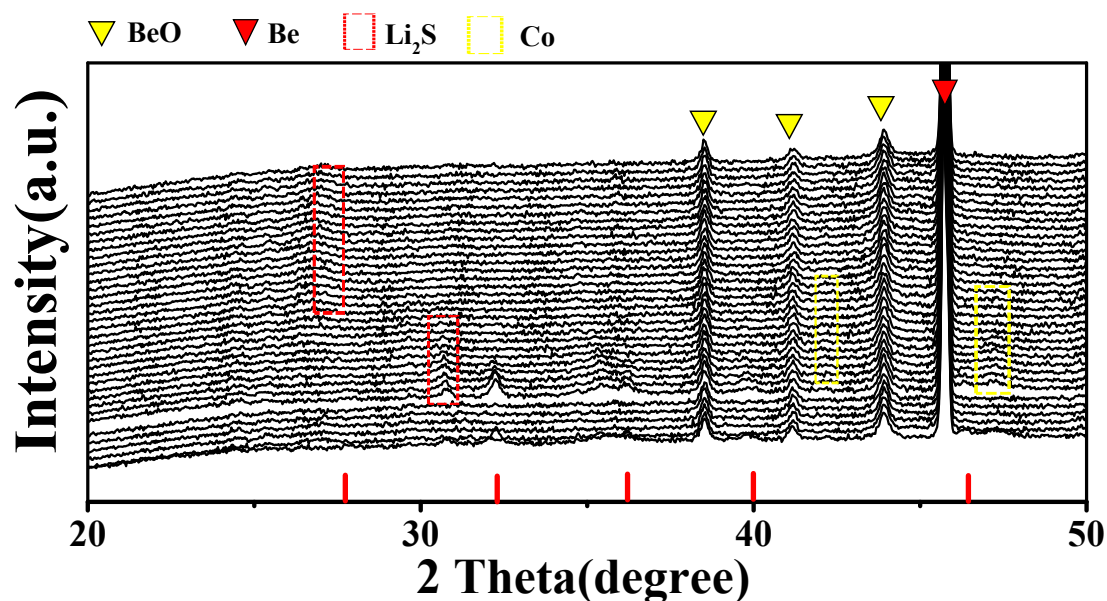

Figure S3. show an expanded region from 20°. to 50°.

Table S1. The experimental materials and drugs.

| Name of Reagent                                 | Specifications and Models | The Manufacturers                         |
|-------------------------------------------------|---------------------------|-------------------------------------------|
| GO                                              | -                         | Self-made                                 |
| C                                               | AR                        | Beijing Bailingwei Technology Co., LTD    |
| H <sub>2</sub> SO <sub>4</sub>                  | AR                        | Luoyang Chemical Reagent Factory          |
| HNO <sub>3</sub>                                | AR                        | Luoyang Chemical Reagent Factory          |
| H <sub>2</sub> O <sub>2</sub>                   | AR                        | Tianjin Deen Chemical Reagent Co., LTD    |
| CoCl <sub>2</sub> ·6H <sub>2</sub> O            | GR                        | Tianjin Deen Chemical Reagent Co., LTD    |
| NaBH <sub>4</sub>                               | AR                        | Aladdin Co. LTD                           |
| C <sub>4</sub> H <sub>9</sub> NO <sub>2</sub> S | GR                        | Aladdin Co. LTD                           |
| KMnO <sub>4</sub>                               | GR                        | Aladdin Co. LTD                           |
| NaNO <sub>4</sub>                               | GR                        | Aladdin Co. LTD                           |
| C <sub>2</sub> H <sub>5</sub> OH                | AR                        | Beijing Bailingwei Technology Co., LTD    |
| NMP                                             | AR                        | Henan Li Dynamic Power Supply Co. LTD     |
| DMC                                             | AR                        | Henan Li Dynamic Power Supply Co. LTD     |
| PVDF                                            | AR                        | Henan Li Dynamic Power Supply Co. LTD     |
| PP                                              | AR                        | Henan Huarui High-tech Materials Co., LTD |
| LiPF <sub>6</sub>                               | AR                        | Henan Huarui High-tech Materials Co., LTD |

**Table S2.** Electrochemical performance comparison of the as-prepared CoS<sub>2</sub>@rGO anode with other previously reported CoS<sub>2</sub>-based anodes in LIBs.

| Types of Materials                                                 | Current Density<br>(A g <sup>-1</sup> ) | Cycle Number<br>(N) | Specific Capacity<br>(mAh g <sup>-1</sup> ) | Ref.      |
|--------------------------------------------------------------------|-----------------------------------------|---------------------|---------------------------------------------|-----------|
| CoS <sub>2</sub> /MCF                                              | 1.0                                     | 300                 | 630                                         | [3]       |
| CoS <sub>2</sub> /rGO                                              | 0.1/1.0                                 | 50/150              | 648/458                                     | [41]      |
| CoS <sub>2</sub> /CNTs                                             | 0.1                                     | 100                 | 568                                         | [42]      |
| NiCo <sub>2</sub> S <sub>4</sub> @NiCo <sub>2</sub> S <sub>4</sub> | 0.2                                     | 100                 | 334                                         | [6]       |
| Nano-sized CoS <sub>2</sub>                                        | 0.1                                     | 50                  | 302                                         | [7]       |
| 3D spongy CoS <sub>2</sub> /C                                      | 0.5                                     | 120                 | 610                                         | [8]       |
| Cross-nanoflower<br>CoS <sub>2</sub>                               | 0.5                                     | 100                 | 650                                         | [43]      |
| CoS <sub>2</sub> @rGO                                              | 0.2/3.0                                 | 100/305             | 739/288                                     | This work |
